# Supplementary material for: SCPRED: Accurate prediction of protein structural class for sequences of twilight-zone similarity with predicting sequences
Source: Springer Nature journal article supplement (doi:10.1186/1471-2105-9-226), 2008-05-01

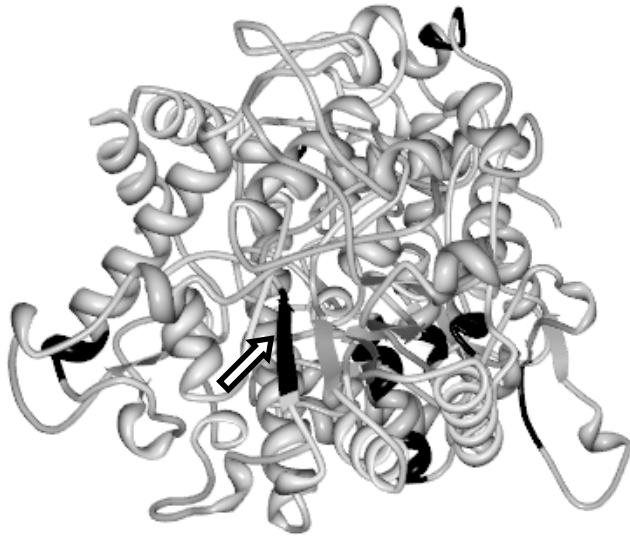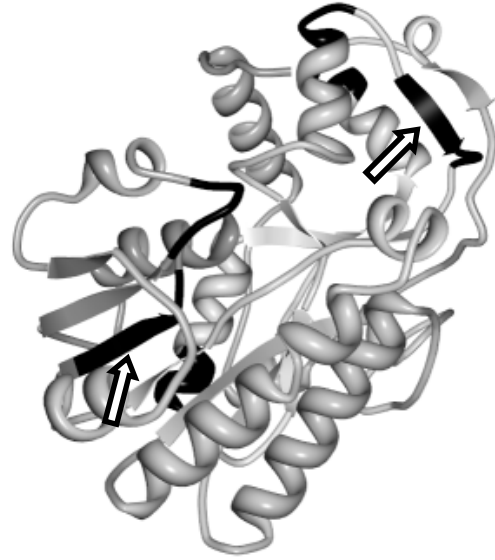

Supplement: 12859_2007_2211_MOESM2_ESM.pdf [file 12859_2007_2211_MOESM2_ESM.pdf]
